# Supplementary material
Source: ML conference proceedings conference paper supplement (https://proceedings.mlr.press/v119/vernade20a.html)
Supplement: Supplementary file 1 [file vernade20a-supp.pdf]

### A. Proof of Theorem 3

For  $p, q \in (0, 1)$  let  $d(p, q) = p \log(p/q) + (1-p) \log((1-p)/(1-q))$  be the relative entropy between Bernoulli distributions with biases  $p$  and  $q$  respectively. For  $\theta \in [0, 1]^K$  let  $\mathbb{E}_\theta$  denote the expectation when the algorithm interacts with the Bernoulli bandit determined by  $\theta \in [0, 1]^K$ . Let  $\theta = (1/2 + \Delta, 1/2, \dots, 1/2)$  where  $\Delta \in (0, 1/4)$  is some parameter to be tuned subsequently. Then let

$$i = \arg \min_{k > 1} \mathbb{E}_\theta [N_k(T)].$$

By the pigeonhole principle it follows that  $\mathbb{E}_\theta [N_i(T)] \leq T/(K-1)$ . Then define  $\phi \in [0, 1]^K$  so that  $\phi_j = \theta_j$  for all  $j \neq i$  and  $\phi_i = 1/2 + 2\Delta$ . By the definitions of  $\theta$  and  $\phi$  we have

$$R_\theta(T) \geq \Delta(T - \mathbb{E}_\theta [N_1(T)]) \quad \text{and} \quad R_\phi(T) \geq \Delta \mathbb{E}_\phi [N_1(T)],$$

which means that

$$R_\theta(T) \geq \frac{T\Delta}{2} \mathbb{P}_\theta(N_1(T) \leq T/2) \quad \text{and} \quad R_\phi(T) \geq \frac{T\Delta}{2} \mathbb{P}_\phi(N_1(T) > T/2).$$

Summing the two regrets and applying the Bretagnolle-Huber inequality shows that

$$\begin{aligned} R_\theta(T) + R_\phi(T) &\geq \frac{T\Delta}{2} (\mathbb{P}_\theta(N_1(T) \leq T/2) + \mathbb{P}_\phi(N_1(T) > T/2)) \\ &\geq \frac{T\Delta}{4} \exp(-KL(\mathbb{P}_\theta, \mathbb{P}_\phi)). \end{aligned}$$

The next step is to calculate the relative entropy between  $\mathbb{P}_\theta$  and  $\mathbb{P}_\phi$ . Both bandits behave identically on all arms except action  $i$ . When action  $i$  is played the learner effectively observes a reward with bias either  $\tau_m/2$  or  $\tau_m(1/2 + 2\Delta)$ . Therefore

$$KL(\mathbb{P}_\theta, \mathbb{P}_\phi) = \mathbb{E}_\theta [N_i(T)] d(\tau_m/2, \tau_m(1/2 + 2\Delta)).$$

Upper bounding the relative entropy by the  $\chi$ -squared distance shows that

$$d(\tau_m/2, \tau_m(1/2 + 2\Delta)) \leq \frac{2(\tau_m/2 - \tau_m(1/2 + 2\Delta))^2}{\tau_m(1/2 - 2\Delta)} \leq 32\tau_m\Delta^2,$$

where we used the assumption that  $2\Delta \leq 1/4$ . Therefore

$$KL(\mathbb{P}_\theta, \mathbb{P}_\phi) \leq 32\tau_m\Delta^2 \mathbb{E}_\theta [N_i(T)] \leq \frac{32\tau_m\Delta^2 T}{K-1}.$$

Finally we conclude that

$$R_\theta(T) + R_\phi(T) \geq \frac{T\Delta}{4} \exp\left(-\frac{32\tau_m\Delta^2 T}{K-1}\right).$$

The result follows by tuning  $\Delta$ .
